# Supplementary material
Source: PubMed Central journal article supplement (PMC3048686)
Supplement: supp_M110.163006_jbc.M110.163006-1.pdf [file supp_M110.163006_jbc.M110.163006-1.pdf]

# Supplemental figure 1

**A**

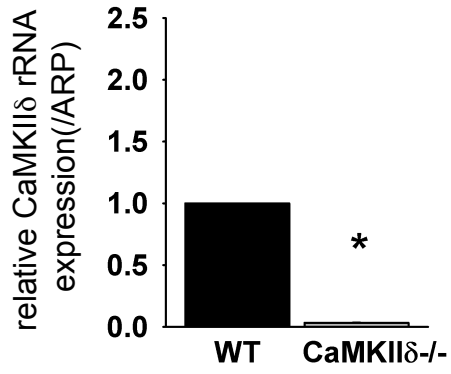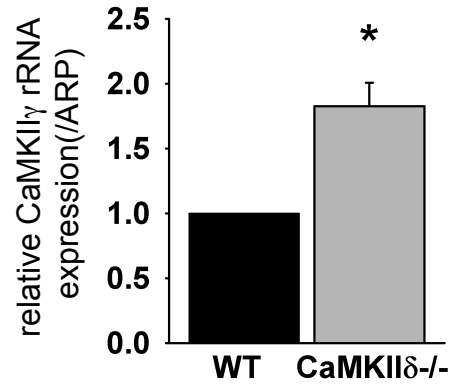

**B**

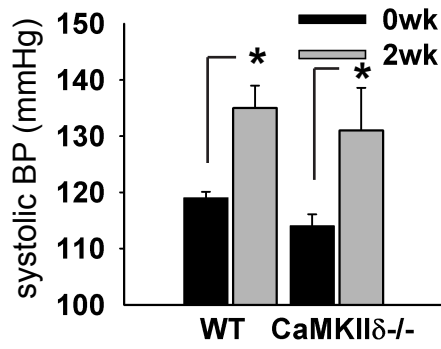

**C**

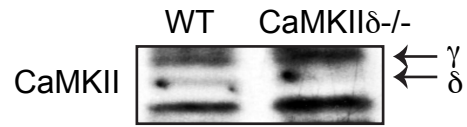

## Supplemental Figure 2

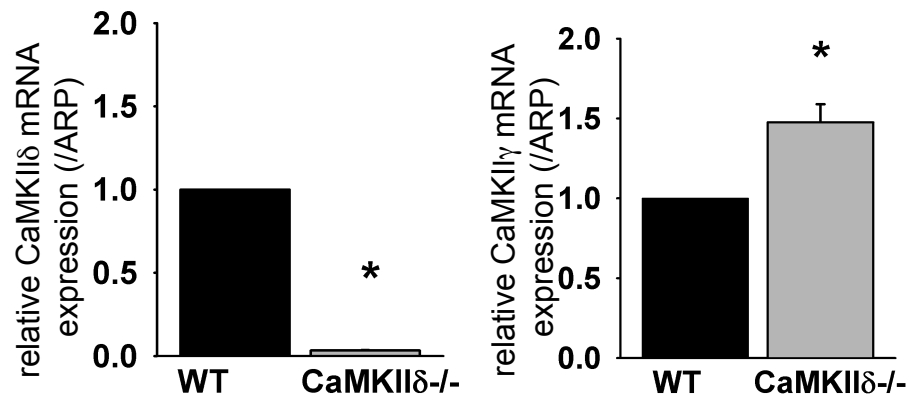

### **Supplemental data**

**Figure 1: Vascular characteristics of CaMKII $\delta^{-/-}$  mice. (A)** Quantitative rt-PCR for CaMKII $\gamma$  and  $\delta$  expression in the aorta of wild-type and CaMKII $\delta^{-/-}$  mice (n=4/group). Values are presented relative to wild-type. (\*p<0.05) **(B)** Systolic blood pressures were measured by tail cuff method in CaMKII $\delta^{-/-}$  mice and controls at baseline or after infusion of 1.25 $\mu$ g/kg/min Ang-II for 14 days (n=5-6/group). **(C)** Immunoblots for CaMKII in the aorta. The lower band (~52 kD) represents CaMKII $\delta$  and is absent in CaMKII $\delta^{-/-}$ -aorta.

**Figure 2: CaMKII isoform mRNA expression in VSMC.** CaMKII $\gamma$  and  $\delta$  mRNA expression in CaMKII $\delta^{-/-}$  and wild-type VSMCs. The expression levels are adjusted to ARP and displayed as ratios relative to wild type.
